# Supplementary material for: Comprehensive substrate specificity profiling of the human Nek kinome reveals unexpected signaling outputs
Source: eLife journal article supplement (doi:10.7554/elife.44635), 2019-05-24
Supplement: supp [file elife_poa_e44635_Source_Data_File_1.xlsx]

## Sheet: Explanation
Supplementary file to van de Kooij et al., eLife, 2019
Each tab contains the Position Specific Scoring Matrix (PSSM) of the phosphorylation site motif for the indicated human Nek kinase family member
Eperimental details on the PSSMs of Nek1 and Nek3-Nek10 can be found in van de Kooij et al., eLife 2019.
The PSSM of Nek2 was obtained by reanalysis of the data described in Alexander et al., Sci Signal 4, 2011. The values at the zero position of the Nek2 PSSM are derived from the peptide experiments presented in Figure 1-figure supplement 4 in van de Kooij et al., eLife 2019
Each matrix contains the specificity score for each amino acid (rows, one letter code) including phosphoryalted threonine and tyrosine (pT and pY) on the positions ranging from -5 to +4 relative to the phosphoacceptor site (columns).
To obtain these scores, the raw intensities for each OPLS dot blot were normalized to the average of all intensities (minus pT and pY) in that position.
Subsequently, these normalized intensities were averaged over all experimental repeats.

## Sheet: Nek1
Normalized, Averaged Data
	-5	-4	-3	-2	-1	0	+1	+2	+3	+4
P	0.772943	0.634274	0.702221	0.500857	0.0446912		0.0392515	0.570837	0.490677	0.795269
G	1.15165	1.0961	1.27747	1.23589	0.695531		1.0007	0.978371	0.852275	1.09289
A	0.938606	0.935113	1.25467	0.904237	0.759745		0.926984	0.668971	0.653165	0.981195
C	0.899846	0.866465	0.584773	0.819486	0.617325		0.888014	0.490618	0.706159	0.800932
S	0.933997	0.90377	0.902828	1.06948	0.990902	0.726989	1.18021	0.927826	0.685223	0.783126
T	0.91046	1.35965	1.18001	1.71971	1.63778	2.25491	1.7638	1.9457	1.21156	0.969858
V	0.856957	0.867465	0.608362	0.749759	1.35504		1.28504	1.1004	1.27548	0.771116
I	1.07614	0.752025	0.642593	0.980016	0.481424		1.5228	0.541056	1.165	0.923978
L	0.804012	1.26578	1.69337	1.19963	1.32938		1.32059	1.07271	1.43598	1.02991
M	1.26083	0.993153	1.84927	1.32622	1.68841		1.39728	0.972982	1.32377	1.12719
F	0.789905	1.0654	1.7129	0.866575	1.51566		1.23518	0.827888	1.73681	1.36753
Y	0.60941	1.11336	1.01138	0.795858	1.12382	0.0181021	1.12881	1.10895	1.43598	0.605777
W	0.962709	1.49098	0.933529	0.759247	1.14834		1.22453	0.581126	1.14471	1.24453
H	0.835212	0.930189	0.542205	1.07327	1.19595		0.917629	1.22454	0.740264	1.01844
K	1.46973	1.30085	0.920451	0.806191	0.911495		0.898411	1.71558	1.13557	1.47063
R	1.36504	1.08802	0.883109	1.00255	1.81344		0.85286	1.97661	1.19189	1.33332
Q	1.35382	0.701028	0.854949	1.15726	0.985394		1.16703	1.06968	0.696631	0.697327
N	1.25917	1.09426	0.92199	1.32169	0.952281		0.65709	1.09619	0.77007	0.918448
D	0.970138	0.687736	0.49391	0.687522	0.215471		0.173688	0.480015	0.433446	0.978392
E	0.779438	0.854376	1.03001	1.02455	0.537914		0.420102	0.649943	0.915338	1.09012
pT	0.923827	1.17656	1.30327	1.06308	1.28878		1.2201	0.944736	1.23881	0.889756
pY	0.526528	0.304301	0.661358	0.462062	0.50844		0.533889	0.492968	0.961322	0.712441

## Sheet: Nek2
Normalized, Averaged Data
	-5	-4	-3	-2	-1	0	+1	+2	+3	+4
P	0.950682	0.933277	1.02021	0.483644	0.461469		0.411482	0.837606	0.942171	1.05953
G	0.914267	0.886722	1.1565	0.990327	0.795985		0.771281	0.971975	1.02222	1.02059
A	1.01772	1.02081	0.951891	1.14407	1.18651		0.822064	0.943459	0.989175	1.03387
C	1.0228	0.994692	0.930897	0.922794	1.0499		1.072	1.0457	1.04791	1.00126
S	0.988506	1.03838	0.801839	1.2919	1.11996	1.72294	1.34239	1.34778	1.00118	0.983479
T	1.03273	1.09773	0.907367	1.33041	1.32837	0.27706	1.34785	1.45356	1.11007	1.16099
V	0.936918	0.936632	0.687729	0.877522	0.969346		1.33794	0.964629	1.08026	0.954394
I	0.891693	0.958631	0.660475	0.720224	0.788972		1.40324	0.934128	1.07397	1.00299
L	0.966455	1.02587	1.81032	0.857878	0.965849		1.30036	0.775675	1.07272	1.01089
M	0.964492	1.02647	1.53055	0.995482	1.2837		1.42549	0.960645	0.961025	0.901363
F	1.18572	1.14376	1.85033	1.1765	0.892299		1.00018	1.01618	1.05822	1.04356
Y	1.07351	1.02074	1.10511	1.16743	0.873049	0.002	1.07743	1.07713	1.00399	1.04613
W	1.22323	1.43166	1.16136	1.116	0.846745		0.989008	0.873484	0.999488	0.867007
H	1.04921	0.93813	0.93132	0.951615	1.01314		0.964057	1.25653	0.97515	0.99677
K	0.915829	0.97507	0.680334	1.09792	1.09983		0.806096	1.0029	0.943658	0.964171
R	0.997225	0.90417	0.829013	1.2603	1.30559		1.03356	1.63568	1.04693	1.07715
Q	0.938396	0.927179	0.829383	1.08436	1.18213		1.09604	0.803527	0.963943	0.963189
N	0.96477	0.994651	0.858881	1.00312	1.03677		0.812216	0.941964	0.878578	1.02767
D	1.04269	0.952053	0.626329	0.780047	0.868652		0.512362	0.658749	0.924687	0.927939
E	0.92315	0.793374	0.670141	0.748474	0.931707		0.474935	0.498697	0.904653	0.95705
pT	1.05434	0.903249	0.654507	0.463058	0.415068		0.523079	0.448974	0.795169	0.936777
pY	0.951851	1.16885	0.995625	0.661258	0.872158		0.693531	0.638695	0.970187	0.920911

## Sheet: Nek3
Normalized, Averaged Data
	-5	-4	-3	-2	-1	0	+1	+2	+3	+4
P	0.732608	0.063586	0.0539013	0.0752798	0.002		0.00469484	0.246807	0.232866	0.855528
G	0.782046	1.03847	0.620288	1.07694	0.34415		0.145034	1.13239	0.593185	1.36845
A	1.05085	0.904151	0.983856	0.91492	1.02803		0.979632	0.669951	1.21904	0.926221
C	1.33626	1.18459	0.905297	0.706239	0.633703		0.460555	0.414433	0.487954	0.765012
S	1.28492	1.31998	1.2242	1.08468	1.55944	0.971189	1.64865	1.43902	1.05826	1.03605
T	1.33311	1.15098	0.951121	1.36658	2.04596	1.69617	2.2675	2.22812	2.48735	0.912723
V	0.819481	0.956677	0.814617	0.953187	1.44388		1.42595	0.914772	1.31019	0.678919
I	0.624377	0.957558	0.746929	0.952034	0.678755		1.73004	0.599385	1.53175	1.01891
L	1.29285	0.916784	1.68093	1.26412	1.34193		1.4227	0.937215	1.6339	1.13804
M	1.11328	1.19372	1.24066	1.34734	1.79926		2.03827	0.772429	1.47323	1.00824
F	1.51095	1.63777	2.80656	1.31846	1.8349		2.03953	0.85749	1.54254	1.04505
Y	1.10156	1.33538	1.66359	1.97647	1.53763	0.332642	2.26687	1.39673	1.67098	0.982873
W	1.4593	2.28665	1.85197	1.18438	1.40984		1.52058	0.941391	1.90668	1.75447
H	0.76049	0.802236	0.680463	1.06791	1.43976		0.964452	1.36557	0.268475	1.07698
K	1.05729	0.915517	0.280288	0.74104	0.13976		0.150374	1.28229	0.271235	1.23206
R	0.565757	1.06796	0.814184	0.800392	1.93575		0.244386	1.6188	1.22634	1.32565
Q	0.755183	0.486164	1.3565	1.00185	0.398973		0.486936	1.02436	0.214551	0.589158
N	1.14869	0.777348	0.52989	1.13635	0.346408		0.0203362	1.3067	0.190289	1.30229
D	0.608131	0.27641	0.101899	0.163002	0.002		0.002	0.424853	0.17219	0.518405
E	0.662857	0.728077	0.69286	0.868811	0.153746		0.198278	0.427302	0.508993	0.392744
pT	1.13759	0.814976	1.14521	0.264654	0.667668		0.725322	0.393215	1.16814	0.426439
pY	0.747016	0.425952	0.481165	0.488658	0.779582		0.404859	0.333928	0.574538	0.360886

## Sheet: Nek4
Normalized, Averaged Data
	-5	-4	-3	-2	-1	0	+1	+2	+3	+4
P	0.928368	0.768096	0.638496	0.185902	0.16621		0.354117	0.577152	0.349884	0.977987
G	0.726995	0.570552	1.06801	0.795886	0.841035		0.688366	0.31807	0.638393	0.919741
A	0.560673	0.733013	0.476857	0.706195	0.904462		0.649211	0.662352	0.609178	0.815534
C	0.772131	0.850904	1.15465	0.895468	0.685591		0.97475	0.767121	0.829	0.671542
S	0.767225	1.15528	0.776	1.03269	1.42518	0.746487	0.734055	0.939022	0.803904	0.756555
T	1.06955	1.00325	0.931502	2.051	1.50512	1.98201	1.95342	1.73649	1.00612	1.10514
V	0.953653	0.897366	0.453135	0.653546	0.595137		1.06707	0.901059	1.05631	0.825863
I	0.76692	0.915539	0.545712	0.930727	0.376462		1.50093	0.812267	1.29866	1.35862
L	1.31131	1.14152	2.07791	1.56596	0.831831		1.46118	0.856021	1.14888	1.20259
M	1.10986	1.28802	1.81817	1.56263	1.38878		1.84432	1.03162	1.20759	0.874348
F	1.29619	1.36624	2.07801	1.01256	0.942033		1.46788	0.52911	1.48842	0.98848
Y	1.23079	1.28738	0.962361	1.24733	1.19407	0.271501	1.10212	0.789803	1.31645	0.897127
W	1.1401	1.51105	1.05976	0.88153	0.849849		0.88047	0.604819	1.39374	1.4067
H	1.19562	0.832416	0.983875	0.844125	0.914057		0.735292	1.11382	0.72501	0.993038
K	1.39199	1.34586	0.945673	0.720249	2.01184		1.0578	3.05523	1.48636	1.68548
R	1.5128	1.36466	1.70991	1.41361	2.29397		1.51071	2.69373	2.18534	1.38245
Q	0.857882	0.952831	0.86868	1.12524	1.36923		1.20831	1.09355	0.708201	1.04323
N	1.08478	1.23823	0.65508	1.18074	0.990148		0.435031	0.825676	0.444697	0.869955
D	0.822831	0.499124	0.384486	0.237492	0.190561		0.144676	0.31598	0.561559	0.708561
E	0.500337	0.534207	0.411725	0.575878	0.524431		0.230288	0.377105	0.417258	0.517066
pT	1.04944	0.964525	1.28281	0.784689	0.784498		1.5017	1.3032	1.25487	1.39222
pY	0.862997	0.877447	0.96498	0.699044	0.802517		0.45194	0.580264	0.792526	0.759484

## Sheet: Nek5
Normalized, Averaged Data
	-5	-4	-3	-2	-1	0	+1	+2	+3	+4
P	0.910325	0.804232	0.846618	0.239814	0.270974		0.002	0.624412	0.811529	1.28884
G	1.01525	1.03116	1.07832	1.16411	0.681916		1.03325	0.521368	0.982527	1.07828
A	0.94783	0.894742	0.757503	0.877111	0.891391		0.920655	0.867949	0.717261	0.918385
C	0.973764	1.01735	1.24649	1.15121	0.831752		1.1819	0.887125	0.934176	0.964012
S	0.644458	1.02105	0.801	1.16741	1.11933	0.550949	1.06667	0.792859	0.711464	0.851838
T	1.15642	1.18715	1.01218	1.69131	1.71418	2.37617	1.94508	1.78808	1.05279	1.1523
V	0.88032	0.803281	0.40329	0.552384	0.7662		1.11752	1.26662	1.31391	0.73595
I	0.923527	0.844448	0.536889	0.722661	0.750469		1.23111	1.34279	1.56351	1.02847
L	1.09693	1.05034	1.51756	1.24156	1.27903		1.04612	1.16594	1.34521	1.17488
M	1.04105	1.08856	1.51764	1.2427	1.40036		1.79326	1.35049	1.23726	0.995274
F	1.02221	1.23967	1.95128	0.781585	0.829216		1.32227	1.08311	1.53591	0.958827
Y	0.971833	0.88414	1.20451	1.11091	1.16437	0.0728766	0.903649	1.09619	1.35636	1.08064
W	1.16761	1.65593	1.55589	0.938395	0.89534		1.06976	0.97269	1.74047	1.15808
H	1.06752	1.01948	1.00803	1.19907	1.05471		0.905812	1.08755	0.759426	1.11849
K	0.953825	0.86431	0.754574	0.528142	1.17666		0.859953	1.45538	0.605051	1.17953
R	1.06679	0.865161	0.861852	0.834347	1.32672		1.0028	1.77183	1.24917	0.780971
Q	0.944515	0.782632	0.723203	0.967821	1.14837		1.48828	0.65464	0.481894	0.908397
N	1.10322	0.984073	0.864309	1.1297	1.01389		0.624379	0.554713	0.730173	0.922416
D	1.01567	0.918463	0.611558	1.18752	0.868158		0.211304	0.389376	0.496083	1.01394
E	1.09693	1.04383	0.747319	1.27224	0.81697		0.278173	0.326898	0.375829	0.690475
pT	1.01215	0.846868	0.946096	0.626324	0.353582		0.645056	0.476133	0.949414	0.930119
pY	1.05425	0.961103	1.06723	1.01813	0.949199		0.434931	0.689345	0.796142	0.942868

## Sheet: Nek6
Normalized, Averaged Data
	-5	-4	-3	-2	-1	0	+1	+2	+3	+4
P	1.19742	1.25715	1.42504	0.27928	0.0534103		0.002	0.661095	0.828619	1.19491
G	0.919648	1.05209	1.09088	1.38582	0.762213		0.969943	1.45039	1.66352	1.18337
A	1.15897	0.875047	0.700867	1.21309	0.737454		0.635561	1.26277	1.075	1.11655
C	1.55104	1.28506	1.3505	1.11082	1.11586		1.34274	1.16108	1.19934	1.1924
S	1.08772	1.07027	0.933152	1.42735	1.62371	2.2057	1.9625	2.18377	1.31439	1.44745
T	0.713712	0.452209	0.436976	1.06718	0.951084	0.891942	1.20043	0.877251	0.787258	1.18397
V	0.886386	0.601328	0.289568	0.314227	0.488848		0.495941	0.68211	0.674891	0.897112
I	0.506793	0.591673	0.262419	0.314378	0.302647		0.80218	0.652831	0.518462	0.775641
L	0.687018	0.630995	2.28274	0.670502	0.782095		0.821037	0.583574	0.82157	0.860466
M	0.750424	0.88648	1.4155	1.00552	1.01893		1.48995	0.858303	0.660572	0.751426
F	0.828791	0.715832	1.76266	0.806806	1.1713		1.53245	0.642193	0.914343	0.762928
Y	0.805455	0.840533	1.55486	0.797928	0.904464	0.002	1.99929	1.06511	1.01348	1.04122
W	1.34561	1.46653	1.88047	0.953128	1.38412		1.72049	1.07137	1.73569	1.11545
H	1.20015	1.21481	0.788044	1.23805	1.36522		1.23484	1.3128	1.19406	1.29311
K	0.703289	0.705246	0.580632	0.486188	0.804252		0.626117	1.36234	0.962913	0.775351
R	0.413158	0.966894	0.472379	0.227492	1.17485		0.77639	1.01196	1.27425	0.919393
Q	0.633324	1.08051	0.559889	0.617343	1.40718		1.28609	0.576885	0.999317	0.944426
N	1.30057	1.32948	0.896375	1.92342	1.20039		0.730057	1.5851	1.04513	0.906541
D	1.98039	1.88434	0.848773	2.60856	1.38824		0.202755	0.828325	0.718926	0.870944
E	1.23233	1.09351	0.468281	1.55291	1.62255		0.191432	0.170745	0.59828	0.841535
pT	1.11992	1.15378	1.02021	0.912685	0.548212		0.675618	0.496448	0.818639	0.973016
pY	1.05834	1.05169	1.03744	1.82017	2.34155		0.797058	0.443492	0.730965	0.59568

## Sheet: Nek7
Normalized, Averaged Data
	-5	-4	-3	-2	-1	0	+1	+2	+3	+4
P	0.706776	1.17822	1.3829	0.119291	0.002		0.002	0.28207	0.601409	0.810131
G	0.922371	1.06647	0.738014	1.22725	0.665613		0.927203	1.05872	1.45169	1.20644
A	0.865121	0.860676	1.0529	1.05024	0.664603		0.456359	0.838386	0.928899	0.920876
C	1.40085	1.03086	1.11138	0.909784	1.06269		1.27075	0.989451	1.1577	0.911288
S	0.853709	0.998638	0.683618	1.60992	1.63825	2.08977	1.8971	2.59718	1.02601	1.03553
T	0.799634	0.859862	0.460774	1.20919	0.892096	0.348642	0.948685	1.19909	0.605914	0.813496
V	0.889524	0.670483	0.361412	0.21059	0.886556		0.956632	0.794249	0.917233	0.602954
I	0.98722	0.585044	0.495409	0.234418	0.312373		1.29249	0.489068	0.745635	0.673539
L	0.807231	1.04227	3.61087	0.631775	0.822		0.833629	0.469696	1.2092	0.789278
M	0.814025	0.865632	1.82463	1.05122	1.26149		2.00091	0.62695	1.05176	0.825952
F	1.12279	1.25564	2.593	0.755474	1.63204		2.08515	0.673998	1.50051	1.11497
Y	0.616559	0.948948	1.3152	0.880181	0.677716	0.561585	2.13274	1.21536	1.34978	0.765653
W	1.46864	1.35586	1.58845	0.729654	1.34655		1.55227	0.804992	1.74374	1.3517
H	1.03011	0.817136	0.407665	1.39551	1.00655		1.04518	1.37383	0.941463	1.10527
K	0.536923	0.681682	0.245236	0.355815	0.429687		0.213942	1.24019	0.931961	1.31708
R	0.680586	0.782336	0.145853	0.43012	1.51043		0.606722	1.98923	1.19708	1.63573
Q	1.00829	0.708962	0.166308	0.76417	1.10859		1.16227	0.634313	0.745204	0.944531
N	1.20132	1.11535	0.663079	1.69781	1.17683		0.70084	1.93899	0.771026	1.14281
D	2.01623	1.84532	0.56767	2.57505	1.82769		0.0333988	0.687509	0.513997	1.00686
E	1.27209	1.33062	0.585636	2.16255	1.83087		0.0665116	0.0967314	0.609776	0.911991
pT	0.701977	1.04741	0.926991	0.741226	0.658329		0.481331	0.383079	0.641885	0.907057
pY	0.771014	0.912749	0.766758	1.29893	2.02693		0.725336	0.260001	0.696731	0.678497

## Sheet: Nek8
Normalized, Averaged Data
	-5	-4	-3	-2	-1	0	+1	+2	+3	+4
P	1.05432	0.656177	0.51678	0.300289	0.258902		0.00055532	0.4546	0.93576	1.22595
G	1.00698	0.767432	0.998049	0.985713	0.379302		0.529111	0.482648	0.863827	0.889862
A	0.806824	0.677221	0.766228	0.710182	0.773067		0.642587	0.749852	0.644167	0.711517
C	1.05804	1.10422	1.36307	1.41117	0.82299		1.20697	0.673594	1.14561	0.981364
S	0.764445	1.02965	1.28498	0.965178	0.941974	0.543717	1.00317	0.950046	0.727867	0.824696
T	1.18099	1.07416	1.37489	2.30604	1.94743	2.42417	2.11324	2.4703	1.50739	1.19989
V	0.657726	0.559347	0.421729	0.649112	0.727137		1.06884	1.04741	0.718604	0.781206
I	0.640314	0.722935	0.804156	0.82442	0.608771		1.07859	1.03502	1.03292	0.990097
L	0.691666	0.834791	1.52126	1.08997	1.05892		0.912866	0.773275	1.07815	1.13337
M	0.836455	1.07596	1.94541	1.09816	1.31773		2.09765	1.12966	1.1515	0.89573
F	1.27696	1.16857	1.48177	0.899382	0.804365		1.84382	1.19845	2.17264	1.06821
Y	1.18901	0.998379	1.12165	1.42421	1.12232	0.0321145	1.32718	1.59748	1.19477	1.03524
W	1.49512	2.88199	0.862189	1.57939	1.06335		1.18984	1.10025	1.80236	1.51219
H	1.01176	0.971917	1.10582	0.996264	1.33999		0.997951	0.954139	0.96017	0.992203
K	0.867562	0.660985	0.541767	0.40536	0.983654		0.635889	1.46975	0.769717	1.3677
R	1.04629	0.928611	0.722047	0.557079	1.51049		1.16142	2.02485	1.07815	1.23979
Q	1.04718	0.816747	0.832934	0.840105	1.57389		1.17713	0.580433	0.598335	0.874813
N	0.965485	0.95869	0.867519	0.953241	0.800552		0.603023	0.853625	0.624435	0.961345
D	1.37801	1.21127	0.740122	1.20253	0.900655		0.2118	0.258082	0.694737	0.840193
E	1.02486	0.900949	0.727629	0.802216	1.06451		0.198375	0.19653	0.298897	0.474633
pT	0.906105	0.731353	1.00229	0.783475	0.476572		0.722455	0.699745	0.94813	1.20562
pY	1.05373	1.37365	1.32804	1.14921	1.64589		0.731435	0.575277	0.903444	1.05392

## Sheet: Nek9
Normalized, Averaged Data
	-5	-4	-3	-2	-1	0	+1	+2	+3	+4
P	1.06458	1.45213	1.29223	0.807139	0.344843		0.278808	0.799131	1.06596	0.820891
G	1.19196	1.11379	1.33578	1.15222	1.05719		1.04865	1.08764	1.13688	0.997469
A	1.28133	0.896038	0.800985	1.06317	0.83954		0.724586	1.00606	0.90736	1.00136
C	1.07814	0.94221	0.981589	1.03253	0.823467		1.20129	0.868012	0.98475	0.962224
S	1.09501	1.19876	1.17051	1.1986	1.58674	1.65287	1.77286	1.65828	1.57449	1.38399
T	0.9091	0.64274	0.82495	0.938057	1.25259	1.00401	1.35049	1.26711	0.965626	1.27437
V	0.885932	0.643597	0.436078	0.505934	0.868076		0.92631	0.876429	0.652096	0.834041
I	0.560477	0.560853	0.338452	0.55711	0.387658		0.85198	0.692898	0.583737	0.747446
L	0.74186	0.855143	1.33465	1.08333	0.802222		0.744686	0.721664	0.829834	0.828966
M	0.787495	0.943819	1.89716	1.25303	1.32122		1.46412	0.805335	0.858223	0.83367
F	0.864412	0.881581	0.905927	0.827195	1.11833		1.03182	0.495036	0.952219	0.97377
Y	0.831269	0.98847	0.957587	1.031	1.05907	0.343119	1.48074	1.19289	1.14846	0.952083
W	1.48858	1.43066	1.06446	1.04054	0.945697		1.15969	0.818982	0.951695	1.21848
H	0.982689	1.14578	0.970434	1.07209	1.31625		0.833371	1.5163	1.15196	1.13991
K	0.942354	0.853956	1.09074	0.494083	1.01514		1.01755	1.55489	1.26803	1.05436
R	0.780144	0.88843	0.812699	0.463622	1.20509		1.548	1.6958	1.13042	1.05781
Q	0.812389	1.05347	0.855269	0.699416	1.22239		1.02973	0.90996	1.13341	1.01276
N	1.22915	1.18868	1.31622	1.702	1.43226		0.711918	1.35773	1.21636	0.892204
D	1.36452	1.30138	0.829394	1.71005	0.647844		0.448863	0.548267	0.793275	1.04029
E	1.10861	1.01851	0.784877	1.36888	0.754384		0.374532	0.312568	0.695235	0.914221
pT	0.999555	1.09916	1.07995	0.819354	0.80695		0.854573	0.626895	0.885695	1.06645
pY	0.985386	1.00542	0.938297	0.798912	1.17046		0.657821	0.555955	0.863509	1.0646

[truncated: 2 more sheets: Nek10 I693P on Ser_Thr library, Nek10 WT on Tyr library]
