# Supplementary figures and images for: Comprehensive substrate specificity profiling of the human Nek kinome reveals unexpected signaling outputs
Source: eLife journal article supplement (doi:10.7554/elife.44635), 2019-05-24

Figure 1-figure supplement 3

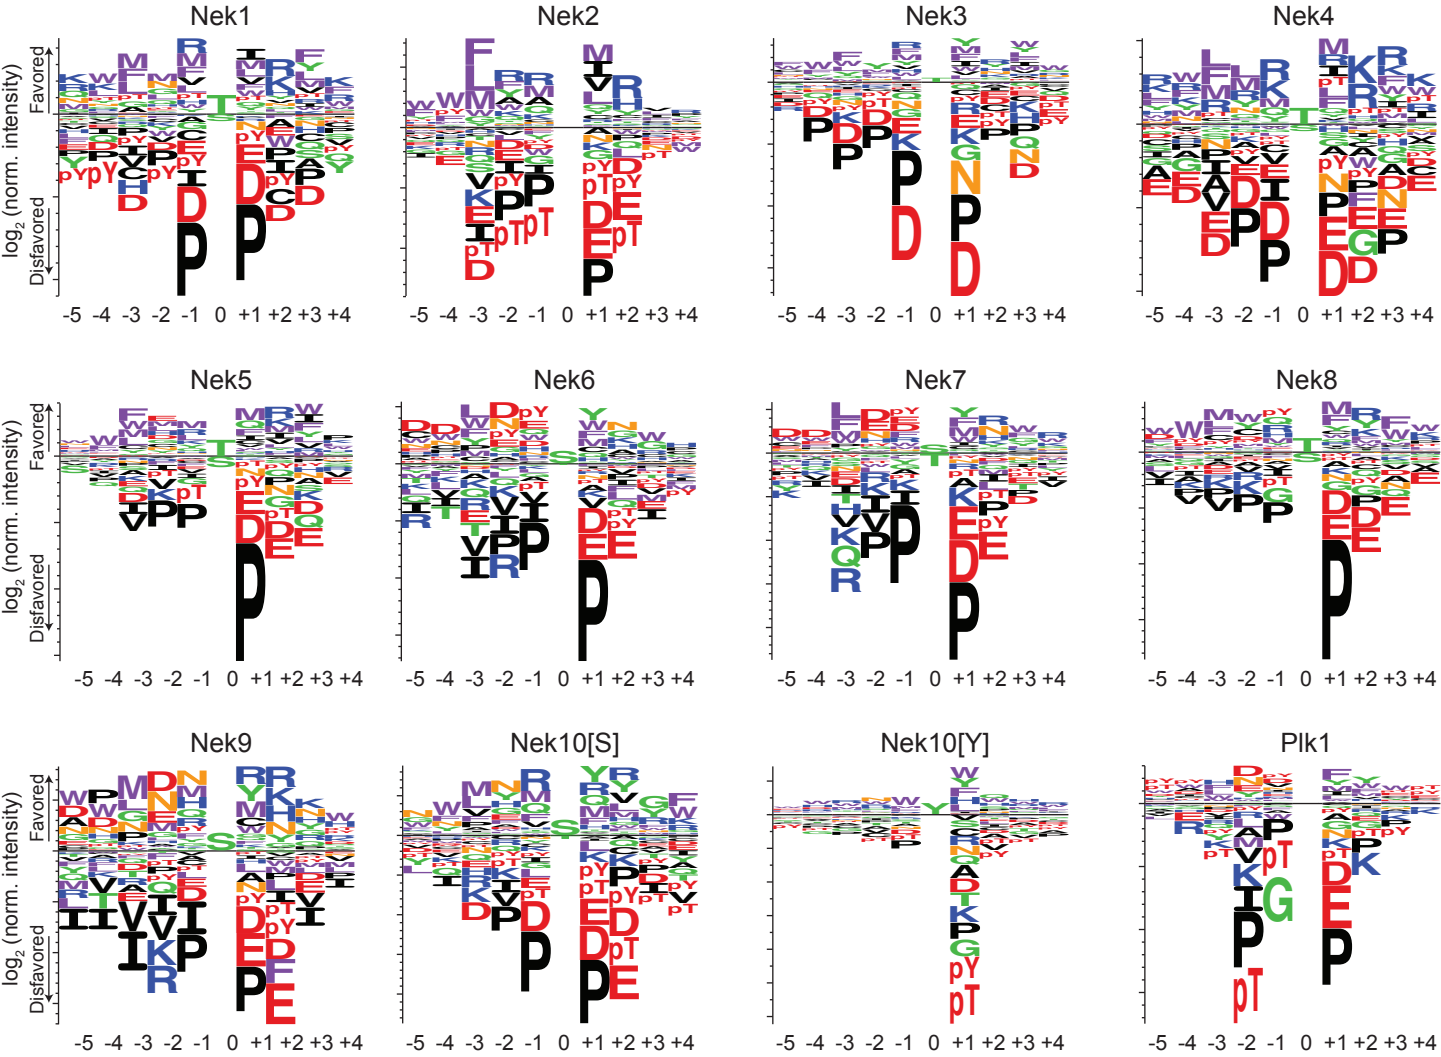

Supplement: supp [file elife-44635-supp-v1.zip]
